# Supplementary material
Source: PubMed Central journal article supplement (PMC4716303)
Supplement: cdd201587x3.pdf [file cdd201587x3.pdf]

|     | miR gene family | ID                         |
|-----|-----------------|----------------------------|
| 1   | let-7           | hsa-let-7a                 |
| 2   |                 | hsa-let-7b                 |
| 3   |                 | hsa-let-7e                 |
| 4   |                 | hsa-let-7g                 |
| 5   |                 | hsa-let-7i                 |
| 6   |                 | hsa-mir-98                 |
| 7   | miR-1           | hsa-miR-1                  |
| 8   |                 | hsa-miR-206                |
| 9   | miR-7           | hsa-miR-7                  |
| 10  | miR-8           | hsa-miR-141                |
| 11  |                 | hsa-miR-200a               |
| 12  |                 | hsa-miR-200b               |
| 13  |                 | hsa-miR-200c               |
| 14  | miR-9           | hsa-miR-9                  |
| 15  | miR-10          | hsa-miR-10a                |
| 16  |                 | hsa-miR-10b                |
| 17  | miR-15          | hsa-miR-15a-16-1 cluster   |
| 18  |                 | hsa-miR-15b-16-2 cluster   |
| 19  |                 | hsa-miR-16                 |
| 20  |                 | hsa-mir-195                |
| 21  | miR-17          | hsa-miR-17                 |
| 22  |                 | hsa-miR-18a                |
| 23  |                 | hsa-miR-20a                |
| 24  |                 | hsa-miR-93                 |
| 25  |                 | hsa-miR-106b               |
| 26  |                 | hsa-miR-106b/93/25-cluster |
| 27  | miR-19          | hsa-miR-19a                |
| 28  |                 | hsa-miR-19b                |
| 29  | miR-21          | mmu-miR-21a                |
| 30  | miR-23          | hsa-miR-23a                |
| 31  |                 | hsa-miR-23b                |
| 32  | miR-24          | hsa-miR-24                 |
| 33  | miR-25          | hsa-miR-25                 |
| 34  |                 | hsa-miR-92a                |
| 35  | miR-26          | hsa-miR-26a                |
| 36  |                 | hsa-miR-26b                |
| 38  | miR-27          | hsa-miR-27a                |
| 39  |                 | hsa-miR-27b                |
| 40  | miR-28          | hsa-miR-28                 |
| 41  | miR-30          | hsa-miR-30b                |
| 42  |                 | hsa-miR-30c                |
| 43  | miR-32          | hsa-miR-32                 |
| 44  | miR-34          | hsa-miR-34a                |
| 45  |                 | hsa-miR-34b                |
| 46  |                 | hsa-miR-34c                |
| 47  | miR-95          | hsa-mir-95                 |
| 48  | miR-96          | hsa-miR-96                 |
| 49  | miR-99          | hsa-miR-99a                |
| 50  | miR-101         | hsa-miR-101                |
| 51  | miR-103         | hsa-miR-103a               |
| 52  | miR-124         | hsa-miR-124                |
| 53  | miR-125         | hsa-miR-125a               |
| 54  |                 | hsa-miR-125b               |
| 55  | miR-126         | hsa-miR-126                |
| 56  | miR-127         | hsa-miR-127                |
| 57  | miR-128         | hsa-miR-128a               |
| 58  | miR-129         | hsa-miR-129                |
| 59  | miR-130         | hsa-miR-130b               |
| 60  |                 | hsa-miR-301a               |
| 61  | mir-132         | hsa-miR-212                |
| 62  | miR-133         | hsa-miR-133a               |
| 63  | miR-135         | hsa-miR-135a               |
| 64  | miR-140         | hsa-miR-140                |
| 65  | miR-142         | hsa-miR-142                |
| 66  | miR-144         | hsa-miR-144                |
| 67  | miR-146         | hsa-miR-146a               |
| 68  | miR-149         | hsa-miR-149                |
| 69  | miR-150         | hsa-miR-150                |
| 70  | miR-155         | hsa-miR-155                |
| 71  | miR-181         | hsa-miR-181a               |
| 72  |                 | hsa-miR-181b               |
| 73  | miR-182         | hsa-miR-182                |
| 74  | miR-184         | hsa-miR-184                |
| 75  | miR-185         | hsa-miR-185                |
| 76  | miR-188         | hsa-miR-188                |
| 77  |                 | hsa-miR-532                |
| 78  | mir-190         | hsa-miR-190                |
| 79  | miR-192         | hsa-miR-192                |
| 80  | miR-196         | hsa-miR-196a               |
| 81  | miR-197         | hsa-miR-197                |
| 82  | miR-198         | hsa-miR-198                |
| 83  | miR-199         | hsa-miR-199a               |
| 84  |                 | hsa-mir-199b               |
| 85  | miR-203         | hsa-miR-203                |
| 86  | miR-204         | hsa-miR-204                |
| 87  |                 | hsa-miR-211                |
| 88  | miR-205         | hsa-miR-205                |
| 89  | miR-208         | hsa-miR-208a               |
| 90  | miR-210         | hsa-miR-210                |
| 91  | miR-216         | hsa-miR-216a               |
| 92  | miR-218         | hsa-miR-218                |
| 93  | miR-219         | hsa-miR-219                |
| 94  | miR-221         | hsa-miR-221                |
| 95  |                 | hsa-miR-222                |
| 96  | miR-223         | hsa-miR-223                |
| 97  | miR-224         | hsa-miR-224                |
| 98  | miR-299         | hsa-miR-299                |
| 99  | miR-320         | hsa-miR-320a               |
| 100 | miR-378         | hsa-miR-378                |
| 101 | miR-744         | hsa-miR-744                |
