# Supplementary material
Source: PubMed Central journal article supplement (PMC4716303)
Supplement: cdd201587x5.pdf [file cdd201587x5.pdf]

| measurement ID | Fold Change | P-Value | GENE_SYMBOL | GENE_NAME                                                                              |
|----------------|-------------|---------|-------------|----------------------------------------------------------------------------------------|
| A_55_P2095251  | 0.144       | 0.041   | EII3        | elongation factor RNA polymerase II-like 3                                             |
| A_51_P343517   | 0.153       | 0.054   | Ly6d        | lymphocyte antigen 6 complex, locus D                                                  |
| A_52_P553890   | 0.202       | 0.067   | Itgb3       | integrin beta 3                                                                        |
| A_52_P312102   | 0.227       | 0.055   | Sema3g      | sema domain, immunoglobulin domain (Ig), short basic domain, secreted, (semaphorin) 3G |
| A_55_P2040893  | 0.248       | 0.035   | Tnni2       | troponin I, skeletal, fast 2                                                           |
| A_51_P405167   | 0.259       | 0.007   | Maf         | avian musculoaponeurotic fibrosarcoma (v-maf) AS42 oncogene homolog                    |
| A_55_P2021810  | 0.266       | 0.037   | Arc         | activity regulated cytoskeletal-associated protein                                     |
| A_30_P01027147 | 0.267       | 0.043   |             |                                                                                        |
| A_55_P2000158  | 0.269       | 0.005   | Pik3r3      | phosphatidylinositol 3 kinase, regulatory subunit, polypeptide 3 (p55)                 |
| A_30_P01028465 | 0.269       | 0.002   |             |                                                                                        |
| A_55_P2078433  | 0.285       | 0.06    | Mcoln2      | mucoilin 2                                                                             |
| A_55_P2119927  | 0.29        | 0.03    |             |                                                                                        |
| A_55_P1994042  | 0.294       | 0.03    | Zbp1        | Z-DNA binding protein 1                                                                |
| A_51_P261059   | 0.295       | 0.037   | Cpne2       | copine II                                                                              |
| A_55_P2004761  | 0.296       | 0.026   | H2-Eb2      | histocompatibility 2, class II antigen E beta2                                         |
| A_52_P285024   | 0.297       | 0.028   | Sertad4     | SERTA domain containing 4                                                              |
| A_51_P175580   | 0.307       | 0.007   | Trp53inp1   | transformation related protein 53 inducible nuclear protein 1                          |
| A_30_P01029732 | 0.319       | 0.048   |             |                                                                                        |
| A_55_P2056719  | 0.32        | 0.037   | AF067061    | cDNA sequence AF067061                                                                 |
| A_55_P1984243  | 0.332       | 0.079   | Naip2       | NLR family, apoptosis inhibitory protein 2                                             |
| A_55_P2007878  | 0.332       | 0.08    | Rnf144b     | ring finger protein 144B                                                               |
| A_55_P1982638  | 0.333       | 0.068   | LOC639910   | uncharacterized LOC639910                                                              |
| A_55_P2096917  | 0.338       | 0.007   | Mreg        | melanoregulin                                                                          |
| A_55_P1957700  | 0.342       | 0.067   | Tll11       | tubulin tyrosine ligase-like family, member 11                                         |
| A_55_P2375194  | 0.349       | 0.01    | P2rx3       | purinergic receptor P2X, ligand-gated ion channel, 3                                   |
| A_30_P01019857 | 0.353       | 0.08    |             |                                                                                        |
| A_30_P01023506 | 0.355       | 0.064   |             |                                                                                        |
| A_51_P128667   | 0.366       | 0.059   | Lynx1       | Ly6/neurotoxin 1                                                                       |
| A_55_P2182358  | 0.368       | 0.04    | Arid3a      | AT rich interactive domain 3A (BRIGHT-like)                                            |
| A_66_P112596   | 0.37        | 0.018   |             |                                                                                        |
| A_51_P202050   | 0.371       | 0.036   | Dtx1        | deltex 1 homolog (Drosophila)                                                          |
| A_55_P2086628  | 0.372       | 0.083   |             |                                                                                        |
| A_52_P58524    | 0.375       | 0.036   | Neu1        | neuraminidase 1                                                                        |
| A_55_P1973906  | 0.379       | 0.034   | Trp53inp1   | transformation related protein 53 inducible nuclear protein 1                          |
| A_55_P2103837  | 0.381       | 0.002   | Gbp4        | guanylate binding protein 4                                                            |
| A_55_P1958379  | 0.381       | 0.037   | Slit1       | slit homolog 1 (Drosophila)                                                            |
| A_52_P648688   | 0.381       | 0.01    | Zc3h12d     | zinc finger CCCH type containing 12D                                                   |
| A_52_P208649   | 0.382       | 0.081   | Cartpt      | CART prepropeptide                                                                     |
| A_52_P163939   | 0.387       | 0.006   | Cln6        | ceroid-lipofuscinosis, neuronal 6                                                      |
| A_51_P349413   | 0.388       | 0.061   | Arl5c       | ADP-ribosylation factor-like 5C                                                        |
| A_52_P678895   | 0.389       | 0.022   | Dynlt3      | dynein light chain Tctex-type 3                                                        |
| A_51_P379775   | 0.39        | 0.028   | Nrm         | nurim (nuclear envelope membrane protein)                                              |

|                |       |       |               |                                                                     |
|----------------|-------|-------|---------------|---------------------------------------------------------------------|
| A_55_P1952166  | 0.39  | 0.035 | Arid3a        | AT rich interactive domain 3A (BRIGHT-like)                         |
| A_55_P2165889  | 0.391 | 0.008 | Akap17b       | A kinase (PRKA) anchor protein 17B                                  |
| A_30_P01019850 | 0.392 | 0.08  |               |                                                                     |
| A_52_P625321   | 0.395 | 0.017 | Cabp4         | calcium binding protein 4                                           |
| A_55_P2069306  | 0.396 | 0.04  | Ptpn18        | protein tyrosine phosphatase, non-receptor type 18                  |
| A_51_P367780   | 0.397 | 0.007 | Adamts12      | ADAMTS-like 2                                                       |
| A_55_P1960894  | 0.397 | 0.089 | Cabp1         | calcium binding protein 1                                           |
| A_55_P2105963  | 0.401 | 0.019 | P2ry10        | purinergic receptor P2Y, G-protein coupled 10                       |
| A_55_P2153762  | 0.403 | 0.095 | A630081J09Rik | RIKEN cDNA A630081J09 gene                                          |
| A_51_P429212   | 0.404 | 0.064 | Npl           | N-acetylneuraminase pyruvate lyase                                  |
| A_55_P2084691  | 0.407 | 0.049 | Hist1h2ac     | histone cluster 1, H2ac                                             |
| A_51_P308298   | 0.409 | 0.018 | Myl9          | myosin, light polypeptide 9, regulatory                             |
| A_55_P1973159  | 0.411 | 0.006 | Serpinf1      | serine (or cysteine) peptidase inhibitor, clade F, member 1         |
| A_55_P2047932  | 0.412 | 0.005 | Cyb5r4        | cytochrome b5 reductase 4                                           |
| A_55_P2136426  | 0.412 | 0.031 | Prss57        | protease, serine 57                                                 |
| A_52_P572613   | 0.413 | 0.026 | Fcrl6         | Fc receptor-like 6                                                  |
| A_52_P58283    | 0.414 | 0.085 | Kcna5         | potassium voltage-gated channel, shaker-related subfamily, member 5 |
| A_30_P01022027 | 0.414 | 0.021 |               |                                                                     |
| A_51_P116906   | 0.415 | 0.035 | Rapgef3       | Rap guanine nucleotide exchange factor (GEF) 3                      |
| A_30_P01019508 | 0.419 | 0.076 |               |                                                                     |
| A_55_P1992430  | 0.42  | 0.019 | P2rx3         | purinergic receptor P2X, ligand-gated ion channel, 3                |
| A_51_P299805   | 0.424 | 0.055 | Slc46a3       | solute carrier family 46, member 3                                  |
| A_55_P2060922  | 0.426 | 0.052 | Unc5a         | unc-5 homolog A (C. elegans)                                        |
| A_55_P2230638  | 0.428 | 0.012 | Ece1          | endothelin converting enzyme 1                                      |
| A_55_P2386236  | 0.429 | 0.091 | Ceacam2       | carcinoembryonic antigen-related cell adhesion molecule 2           |
| A_55_P2005552  | 0.436 | 0.045 | Arhgef10l     | Rho guanine nucleotide exchange factor (GEF) 10-like                |
| A_51_P293339   | 0.436 | 0.023 | Tob1          | transducer of ErbB-2.1                                              |
| A_55_P2231747  | 0.439 | 0.067 |               |                                                                     |
| A_30_P01024703 | 0.441 | 0.027 |               |                                                                     |
| A_66_P109731   | 0.442 | 0.004 |               |                                                                     |
| A_51_P212741   | 0.444 | 0.002 | Scn2b         | sodium channel, voltage-gated, type II, beta                        |
| A_30_P01020400 | 0.445 | 0.043 |               |                                                                     |
| A_55_P1968843  | 0.445 | 0.041 |               |                                                                     |
| A_55_P2010152  | 0.445 | 0.035 | Sell          | selectin, lymphocyte                                                |
| A_52_P456750   | 0.446 | 0.038 | Aph1b         | anterior pharynx defective 1b homolog (C. elegans)                  |
| A_55_P2213483  | 0.447 | 0.073 | D7Ertd183e    | DNA segment, Chr 7, ERATO Doi 183, expressed                        |
| A_55_P2182001  | 0.448 | 0.079 | 1700008O03Rik | RIKEN cDNA 1700008O03 gene                                          |
| A_30_P01031675 | 0.449 | 0.018 |               |                                                                     |
| A_51_P193686   | 0.449 | 0.038 | 1700012B09Rik | RIKEN cDNA 1700012B09 gene                                          |
| A_55_P1961135  | 0.45  | 0.038 | Atg4d         | autophagy-related 4D (yeast)                                        |
| A_55_P1982404  | 0.451 | 0.008 | Gpm6b         | glycoprotein m6b                                                    |
| A_51_P421664   | 0.453 | 0.022 | Tmem123       | transmembrane protein 123                                           |
| A_55_P2080975  | 0.453 | 0.033 | Rbm41         | RNA binding motif protein 41                                        |

|                |       |       |               |                                                                                                |
|----------------|-------|-------|---------------|------------------------------------------------------------------------------------------------|
| A_55_P2049098  | 0.455 | 0.017 |               |                                                                                                |
| A_30_P01022866 | 0.456 | 0.012 |               |                                                                                                |
| A_51_P389751   | 0.457 | 0.044 | Relb          | avian reticuloendotheliosis viral (v-rel) oncogene related B                                   |
| A_51_P449325   | 0.458 | 0.088 | H2-Oa         | histocompatibility 2, O region alpha locus                                                     |
| A_55_P2155504  | 0.458 | 0.081 | Lck           | lymphocyte protein tyrosine kinase                                                             |
| A_55_P1979217  | 0.458 | 0.044 | Abtb1         | ankyrin repeat and BTB (POZ) domain containing 1                                               |
| A_51_P181286   | 0.459 | 0.006 | Cd69          | CD69 antigen                                                                                   |
| A_66_P124284   | 0.46  | 0.033 | Tmem90a       | transmembrane protein 90a                                                                      |
| A_52_P203691   | 0.46  | 0.032 | Arl5c         | ADP-ribosylation factor-like 5C                                                                |
| A_55_P1967659  | 0.461 | 0.058 | Lactb         | lactamase, beta                                                                                |
| A_55_P2137309  | 0.461 | 0.009 | Kctd11        | potassium channel tetramerisation domain containing 11                                         |
| A_51_P467960   | 0.463 | 0.044 | Cntd1         | cyclin N-terminal domain containing 1                                                          |
| A_55_P2172121  | 0.465 | 0.031 | Mxd4          | Max dimerization protein 4                                                                     |
| A_51_P116326   | 0.465 | 0.042 | P2rx3         | purinergic receptor P2X, ligand-gated ion channel, 3                                           |
| A_52_P646783   | 0.465 | 0.094 | Fbxl22        | F-box and leucine-rich repeat protein 22                                                       |
| A_55_P2053838  | 0.465 | 0.022 | Tnfaip3       | tumor necrosis factor, alpha-induced protein 3                                                 |
| A_51_P390937   | 0.466 | 0.029 |               |                                                                                                |
| A_66_P130908   | 0.467 | 0.03  | Cyb5r4        | cytochrome b5 reductase 4                                                                      |
| A_55_P2282650  | 0.469 | 0.057 |               |                                                                                                |
| A_30_P01029486 | 0.469 | 0.01  |               |                                                                                                |
| A_55_P2166884  | 0.469 | 0.052 | Gm5481        | predicted gene 5481                                                                            |
| A_55_P2050688  | 0.469 | 0.025 | Zbed4         | zinc finger, BED domain containing 4                                                           |
| A_51_P408946   | 0.47  | 0.015 | Ccne1         | cyclin E1                                                                                      |
| A_55_P2138718  | 0.471 | 0.059 | Gm14483       | predicted gene 14483                                                                           |
| A_55_P2008815  | 0.472 | 0.003 | Rrm2b         | ribonucleotide reductase M2 B (TP53 inducible)                                                 |
| A_51_P447976   | 0.472 | 0.071 | Fam46c        | family with sequence similarity 46, member C                                                   |
| A_55_P1953226  | 0.473 | 0.02  | Gm14484       | predicted gene 14484                                                                           |
| A_66_P116412   | 0.474 | 0.01  | Flt3          | FMS-like tyrosine kinase 3                                                                     |
| A_55_P2158990  | 0.474 | 0.016 | Jun           | Jun oncogene                                                                                   |
| A_51_P245796   | 0.474 | 0.064 | Ddit4         | DNA-damage-inducible transcript 4                                                              |
| A_55_P2097372  | 0.476 | 0.009 | Tctex1d4      | Tctex1 domain containing 4                                                                     |
| A_55_P2168736  | 0.477 | 0.086 | Relb          | avian reticuloendotheliosis viral (v-rel) oncogene related B                                   |
| A_55_P1978316  | 0.479 | 0.011 | Adamts14      | a disintegrin-like and metallopeptidase (reprolysin type) with thrombospondin type 1 motif, 14 |
| A_52_P473106   | 0.479 | 0.067 | Otos          | otospiralin                                                                                    |
| A_66_P125327   | 0.479 | 0.043 | Ccne1         | cyclin E1                                                                                      |
| A_51_P295131   | 0.48  | 0.041 | Pax7          | paired box gene 7                                                                              |
| A_55_P1980796  | 0.481 | 0.066 | Il2ra         | interleukin 2 receptor, alpha chain                                                            |
| A_52_P290799   | 0.482 | 0.011 | Gpr35         | G protein-coupled receptor 35                                                                  |
| A_55_P1955034  | 0.482 | 0.04  | Myo1c         | myosin IC                                                                                      |
| A_52_P266320   | 0.482 | 0.048 | Akap17b       | A kinase (PRKA) anchor protein 17B                                                             |
| A_55_P1982494  | 0.482 | 0.029 | 1700012L04Rik | RIKEN cDNA 1700012L04 gene                                                                     |
| A_55_P2364738  | 0.483 | 0.048 | Plxdc1        | plexin domain containing 1                                                                     |
| A_55_P1969246  | 0.483 | 0.08  |               |                                                                                                |

|                |       |       |               |                                                             |
|----------------|-------|-------|---------------|-------------------------------------------------------------|
| A_55_P2006494  | 0.484 | 0.08  | Apol10b       | apolipoprotein L 10b                                        |
| A_52_P235880   | 0.485 | 0.046 | Gm5134        | predicted gene 5134                                         |
| A_55_P2351193  | 0.485 | 0.093 | Snora47       | small nucleolar RNA, H/ACA box 47                           |
| A_55_P2179341  | 0.486 | 0.048 |               |                                                             |
| A_55_P2106106  | 0.487 | 0.065 | Gpr77         | G protein-coupled receptor 77                               |
| A_30_P01020711 | 0.487 | 0.077 |               |                                                             |
| A_30_P01026525 | 0.488 | 0.017 |               |                                                             |
| A_55_P1985835  | 0.49  | 0.021 | Dnase1        | deoxyribonuclease I                                         |
| A_55_P2086148  | 0.493 | 0.028 | Uhmk1         | U2AF homology motif (UHM) kinase 1                          |
| A_30_P01029723 | 0.493 | 0.063 |               |                                                             |
| A_55_P2038514  | 0.494 | 0.037 |               |                                                             |
| A_55_P2129197  | 0.495 | 0.083 | E030047D23Rik | RIKEN cDNA E030047D23 gene                                  |
| A_30_P01030259 | 0.496 | 0.066 |               |                                                             |
| A_55_P1981544  | 0.496 | 0.066 | Lactb         | lactamase, beta                                             |
| A_55_P1984168  | 0.497 | 0.076 | Casp4         | caspase 4, apoptosis-related cysteine peptidase             |
| A_55_P2077618  | 0.498 | 0.015 | Csgalnact1    | chondroitin sulfate N-acetylgalactosaminyltransferase 1     |
| A_55_P2130104  | 0.499 | 0.011 | 2310046K01Rik | RIKEN cDNA 2310046K01 gene                                  |
| A_55_P1958400  | 0.5   | 0.083 | LOC236220     | uncharacterized LOC236220                                   |
| A_51_P289742   | 0.501 | 0.029 | Slc27a5       | solute carrier family 27 (fatty acid transporter), member 5 |
| A_55_P1986691  | 0.501 | 0.068 | Card6         | caspase recruitment domain family, member 6                 |
| A_52_P507498   | 0.502 | 0.041 | Plxnc1        | plexin C1                                                   |
| A_55_P2058942  | 0.502 | 0.034 | Aldh3b1       | aldehyde dehydrogenase 3 family, member B1                  |
| A_30_P01030456 | 0.502 | 0.06  |               |                                                             |
| A_55_P2046245  | 0.503 | 0.066 | Hes1          | hairy and enhancer of split 1 (Drosophila)                  |
| A_30_P01024111 | 0.503 | 0.092 |               |                                                             |
| A_30_P01022162 | 0.505 | 0.094 |               |                                                             |
| A_52_P216613   | 0.506 | 0.093 | Gpr18         | G protein-coupled receptor 18                               |
| A_55_P2000958  | 0.507 | 0.045 | Sdr39u1       | short chain dehydrogenase/reductase family 39U, member 1    |
| A_30_P01022686 | 0.507 | 0.039 |               |                                                             |
| A_55_P2054511  | 0.507 | 0.009 |               |                                                             |
| A_52_P151905   | 0.508 | 0.007 | Gm5132        | predicted gene 5132                                         |
| A_55_P2118537  | 0.509 | 0.034 |               |                                                             |
| A_55_P1975041  | 0.51  | 0.005 | Arhgef11      | Rho guanine nucleotide exchange factor (GEF) 11             |
| A_55_P2039416  | 0.511 | 0.056 | Sgk1          | serum/glucocorticoid regulated kinase 1                     |
| A_55_P1958088  | 0.511 | 0.051 | Lyn           | Yamaguchi sarcoma viral (v-yes-1) oncogene homolog          |
| A_52_P118706   | 0.515 | 0.041 | 9630013D21Rik | RIKEN cDNA 9630013D21 gene                                  |
| A_51_P420547   | 0.515 | 0.035 | Clic5         | chloride intracellular channel 5                            |
| A_30_P01021899 | 0.517 | 0.059 |               |                                                             |
| A_51_P262144   | 0.517 | 0.04  | Ddx19b        | DEAD (Asp-Glu-Ala-Asp) box polypeptide 19b                  |
| A_55_P2090254  | 0.517 | 0.048 | Sntg2         | syntrophin, gamma 2                                         |
| A_55_P2022074  | 0.517 | 0.065 | Klf10         | Kruppel-like factor 10                                      |
| A_51_P479321   | 0.518 | 0.02  | Acss1         | acyl-CoA synthetase short-chain family member 1             |
| A_30_P01032522 | 0.519 | 0.072 |               |                                                             |

|                |       |       |               |                                                                                     |
|----------------|-------|-------|---------------|-------------------------------------------------------------------------------------|
| A_55_P2254769  | 0.52  | 0.068 | 4931402G19Rik | RIKEN cDNA 4931402G19 gene                                                          |
| A_51_P337230   | 0.521 | 0.064 | Galnt14       | UDP-N-acetyl-alpha-D-galactosamine:polypeptide N-acetylgalactosaminyltransferase 14 |
| A_55_P1975645  | 0.521 | 0.057 | Tmtc1         | transmembrane and tetratricopeptide repeat containing 1                             |
| A_51_P146149   | 0.522 | 0.041 | Napsa         | napsin A aspartic peptidase                                                         |
| A_30_P01029331 | 0.524 | 0.062 |               |                                                                                     |
| A_55_P2258467  | 0.524 | 0.028 | 4833445I07Rik | RIKEN cDNA 4833445I07 gene                                                          |
| A_52_P505827   | 0.525 | 0.04  | Cyb5r4        | cytochrome b5 reductase 4                                                           |
| A_55_P2099620  | 0.526 | 0.03  | Hmx2          | H6 homeobox 2                                                                       |
| A_52_P428673   | 0.526 | 0.075 | Usp49         | ubiquitin specific peptidase 49                                                     |
| A_55_P2031871  | 0.527 | 0.016 | Plekhh3       | pleckstrin homology domain containing, family H (with MyTH4 domain) member 3        |
| A_55_P1954302  | 0.529 | 0.019 | Esrrb         | estrogen related receptor, beta                                                     |
| A_52_P150683   | 0.529 | 0.087 | Grap2         | GRB2-related adaptor protein 2                                                      |
| A_30_P01025480 | 0.53  | 0.071 |               |                                                                                     |
| A_52_P183038   | 0.53  | 0.005 | Impdh1        | inosine 5'-phosphate dehydrogenase 1                                                |
| A_51_P214423   | 0.53  | 0.072 | Tead1         | TEA domain family member 1                                                          |
| A_55_P2128944  | 0.531 | 0.023 | Bcl2l13       | BCL2-like 13 (apoptosis facilitator)                                                |
| A_66_P103970   | 0.532 | 0.04  | Acp1          | acid phosphatase 1, soluble                                                         |
| A_55_P2149951  | 0.532 | 0.06  | Prx           | periaxin                                                                            |
| A_55_P1969861  | 0.534 | 0.002 | Zap70         | zeta-chain (TCR) associated protein kinase                                          |
| A_30_P01019709 | 0.534 | 0.036 |               |                                                                                     |
| A_55_P1986282  | 0.534 | 0.041 | Cdkn1a        | cyclin-dependent kinase inhibitor 1A (P21)                                          |
| A_30_P01033434 | 0.535 | 0.092 |               |                                                                                     |
| A_66_P113262   | 0.535 | 0.041 | Galnt14       | UDP-N-acetyl-alpha-D-galactosamine:polypeptide N-acetylgalactosaminyltransferase 14 |
| A_55_P2134587  | 0.536 | 0.047 | Gm5132        | predicted gene 5132                                                                 |
| A_66_P113556   | 0.536 | 0.023 | Wnt16         | wingless-related MMTV integration site 16                                           |
| A_51_P272066   | 0.536 | 0.038 | 2010109I03Rik | RIKEN cDNA 2010109I03 gene                                                          |
| A_51_P161830   | 0.537 | 0.026 | Enpep         | glutamyl aminopeptidase                                                             |
| A_55_P2101069  | 0.537 | 0.039 | 1700019J19Rik | RIKEN cDNA 1700019J19 gene                                                          |
| A_55_P2018492  | 0.537 | 0.01  | Pgap3         | post-GPI attachment to proteins 3                                                   |
| A_51_P503883   | 0.537 | 0.076 | Plekhh4       | pleckstrin homology domain containing, family G (with RhoGef domain) member 4       |
| A_55_P2090718  | 0.538 | 0.009 | Pop5          | processing of precursor 5, ribonuclease P/MRP family (S. cerevisiae)                |
| A_51_P345340   | 0.538 | 0.012 | 2310043J07Rik | RIKEN cDNA 2310043J07 gene                                                          |
| A_30_P01032696 | 0.538 | 0.065 |               |                                                                                     |
| A_55_P2153459  | 0.538 | 0.002 | Cecr2         | cat eye syndrome chromosome region, candidate 2 homolog (human)                     |
| A_52_P467519   | 0.54  | 0.065 | A430035B10Rik | RIKEN cDNA A430035B10 gene                                                          |
| A_52_P510215   | 0.541 | 0.012 | Traf6         | TNF receptor-associated factor 6                                                    |
| A_52_P88773    | 0.541 | 0.024 | Tor2a         | torsin family 2, member A                                                           |
| A_55_P1977929  | 0.542 | 0.035 | Itgam         | integrin alpha M                                                                    |
| A_55_P1960286  | 0.542 | 0.008 | Spns3         | spinster homolog 3 (Drosophila)                                                     |
| A_52_P31543    | 0.543 | 0.027 | Btg2          | B-cell translocation gene 2, anti-proliferative                                     |
| A_66_P118141   | 0.544 | 0.029 | Sh2d2a        | SH2 domain protein 2A                                                               |
| A_30_P01024633 | 0.546 | 0.013 |               |                                                                                     |
| A_51_P410451   | 0.547 | 0.008 | Tube1         | epsilon-tubulin 1                                                                   |

|                |       |       |               |                                                                                |
|----------------|-------|-------|---------------|--------------------------------------------------------------------------------|
| A_55_P2116149  | 0.549 | 0.059 |               |                                                                                |
| A_55_P2050408  | 0.549 | 0.085 |               |                                                                                |
| A_55_P2107367  | 0.549 | 0.002 | Pbx3          | pre B-cell leukemia transcription factor 3                                     |
| A_55_P2060752  | 0.549 | 0.01  | Usp12         | ubiquitin specific peptidase 12                                                |
| A_55_P1967335  | 0.551 | 0.059 |               |                                                                                |
| A_55_P2115364  | 0.551 | 0.042 |               |                                                                                |
| A_52_P573727   | 0.551 | 0.001 | Rrm2b         | ribonucleotide reductase M2 B (TP53 inducible)                                 |
| A_55_P2081040  | 0.551 | 0.003 | Gpr27         | G protein-coupled receptor 27                                                  |
| A_55_P2181665  | 0.552 | 0.031 | Gm4129        | predicted gene 4129                                                            |
| A_55_P2033445  | 0.552 | 0.093 | Tnfrsf1b      | tumor necrosis factor receptor superfamily, member 1b                          |
| A_55_P1987847  | 0.553 | 0.06  |               |                                                                                |
| A_52_P644690   | 0.553 | 0.091 | Flt3l         | FMS-like tyrosine kinase 3 ligand                                              |
| A_51_P462972   | 0.553 | 0.004 | Mudeng        | MU-2/AP1M2 domain containing, death-inducing                                   |
| A_30_P01021541 | 0.554 | 0.087 |               |                                                                                |
| A_55_P2120155  | 0.555 | 0.056 | Ccdc88b       | coiled-coil domain containing 88B                                              |
| A_52_P221588   | 0.555 | 0.038 | Gm5382        | predicted gene 5382                                                            |
| A_52_P502849   | 0.555 | 0.095 |               |                                                                                |
| A_52_P267391   | 0.555 | 0.009 | Trim12a       | tripartite motif-containing 12A                                                |
| A_55_P1984401  | 0.557 | 0.055 | Shank2        | SH3/ankyrin domain gene 2                                                      |
| A_66_P122883   | 0.557 | 0.091 | Pde8a         | phosphodiesterase 8A                                                           |
| A_55_P2091676  | 0.557 | 0.098 | Fas           | Fas (TNF receptor superfamily member 6)                                        |
| A_55_P2141782  | 0.559 | 0.024 |               |                                                                                |
| A_55_P1961531  | 0.559 | 0.076 | Tmem194       | transmembrane protein 194                                                      |
| A_51_P454217   | 0.56  | 0.086 | Nfkb2         | nuclear factor of kappa light polypeptide gene enhancer in B-cells 2, p49/p100 |
| A_55_P2154387  | 0.561 | 0.089 | Bmp4          | bone morphogenetic protein 4                                                   |
| A_55_P2069256  | 0.561 | 0.054 | Prr19         | proline rich 19                                                                |
| A_55_P2073253  | 0.562 | 0.04  |               |                                                                                |
| A_52_P660477   | 0.562 | 0.045 | Spo11         | sporulation protein, meiosis-specific, SPO11 homolog (S. cerevisiae)           |
| A_55_P2092226  | 0.562 | 0.036 | Foxo6         | forkhead box O6                                                                |
| A_55_P2009121  | 0.563 | 0.068 | Agrn          | agrin                                                                          |
| A_55_P2091551  | 0.563 | 0.046 | Arhgap9       | Rho GTPase activating protein 9                                                |
| A_51_P453010   | 0.564 | 0.023 | Mphosph6      | M phase phosphoprotein 6                                                       |
| A_55_P2172584  | 0.564 | 0.021 | Mageb3        | melanoma antigen, family B, 3                                                  |
| A_51_P303620   | 0.564 | 0.072 | Whrn          | whirlin                                                                        |
| A_52_P136709   | 0.564 | 0.035 | Pctp          | phosphatidylcholine transfer protein                                           |
| A_55_P1976928  | 0.565 | 0.042 | Unc13d        | unc-13 homolog D (C. elegans)                                                  |
| A_52_P56634    | 0.566 | 0.008 | Map3k11       | mitogen-activated protein kinase kinase kinase 11                              |
| A_66_P126332   | 0.567 | 0.053 | Zfp703        | zinc finger protein 703                                                        |
| A_55_P2109932  | 0.567 | 0.017 | Tmem63b       | transmembrane protein 63b                                                      |
| A_52_P342963   | 0.568 | 0.018 | 4930572J05Rik | RIKEN cDNA 4930572J05 gene                                                     |
| A_55_P2325648  | 0.569 | 0.014 | BB085087      | expressed sequence BB085087                                                    |
| A_52_P399990   | 0.57  | 0.039 | B4galt2       | UDP-Gal:betaGlcNAc beta 1,4- galactosyltransferase, polypeptide 2              |
| A_51_P415247   | 0.57  | 0.051 |               |                                                                                |

|                |       |       |               |                                                                                 |
|----------------|-------|-------|---------------|---------------------------------------------------------------------------------|
| A_30_P01023207 | 0.57  | 0.05  |               |                                                                                 |
| A_30_P01025363 | 0.571 | 0.045 |               |                                                                                 |
| A_55_P2079457  | 0.571 | 0.004 |               |                                                                                 |
| A_30_P01026064 | 0.571 | 0.082 |               |                                                                                 |
| A_55_P2057296  | 0.571 | 0.029 | 2310043J07Rik | RIKEN cDNA 2310043J07 gene                                                      |
| A_51_P226142   | 0.571 | 0.027 | Fam116a       | family with sequence similarity 116, member A                                   |
| A_52_P322141   | 0.571 | 0.046 | Ccdc88b       | coiled-coil domain containing 88B                                               |
| A_55_P1979833  | 0.573 | 0.059 | Cited1        | Cbp/p300-interacting transactivator with Glu/Asp-rich carboxy-terminal domain 1 |
| A_55_P1988398  | 0.574 | 0.07  |               |                                                                                 |
| A_55_P1976037  | 0.574 | 0.036 | A430089I19Rik | RIKEN cDNA A430089I19 gene                                                      |
| A_55_P2064299  | 0.576 | 0.035 | Sepx1         | selenoprotein X 1                                                               |
| A_51_P272147   | 0.577 | 0.048 | Fam158a       | family with sequence similarity 158, member A                                   |
| A_52_P595824   | 0.577 | 0.032 | Cpeb4         | cytoplasmic polyadenylation element binding protein 4                           |
| A_51_P440460   | 0.577 | 0.036 | Hip1r         | huntingtin interacting protein 1 related                                        |
| A_55_P1976743  | 0.577 | 0.013 |               |                                                                                 |
| A_55_P2052563  | 0.578 | 0.098 | Id1           | inhibitor of DNA binding 1                                                      |
| A_55_P2043382  | 0.579 | 0.025 | Llgl2         | lethal giant larvae homolog 2 (Drosophila)                                      |
| A_55_P2108275  | 0.579 | 0.04  |               |                                                                                 |
| A_55_P1977468  | 0.579 | 0.015 | Dab2ip        | disabled homolog 2 (Drosophila) interacting protein                             |
| A_55_P2022128  | 0.58  | 0.092 | Cntnap1       | contactin associated protein-like 1                                             |
| A_55_P2009217  | 0.58  | 0.06  | Rnu3b1        | U3B small nuclear RNA 1                                                         |
| A_52_P432969   | 0.58  | 0.073 | Pcdh19        | protocadherin 19                                                                |
| A_30_P01031324 | 0.58  | 0.028 |               |                                                                                 |
| A_55_P2115467  | 0.581 | 0.067 | Tmem63b       | transmembrane protein 63b                                                       |
| A_52_P539434   | 0.581 | 0.046 | Lbh           | limb-bud and heart                                                              |
| A_55_P2146560  | 0.581 | 0.072 | H2-Ab1        | histocompatibility 2, class II antigen A, beta 1                                |
| A_55_P2180504  | 0.581 | 0.017 | 4933413G19Rik | RIKEN cDNA 4933413G19 gene                                                      |
| A_30_P01030613 | 0.582 | 0.073 |               |                                                                                 |
| A_55_P2060747  | 0.582 | 0.015 | Esco1         | establishment of cohesion 1 homolog 1 (S. cerevisiae)                           |
| A_55_P1964752  | 0.583 | 0.068 | Slc23a3       | solute carrier family 23 (nucleobase transporters), member 3                    |
| A_30_P01028270 | 0.583 | 0.046 |               |                                                                                 |
| A_52_P119060   | 0.583 | 0.061 | Acpp          | acid phosphatase, prostate                                                      |
| A_55_P2157483  | 0.584 | 0.01  |               |                                                                                 |
| A_30_P01017888 | 0.584 | 0.041 |               |                                                                                 |
| A_55_P2102533  | 0.584 | 0.042 | Fuca2         | fucosidase, alpha-L- 2, plasma                                                  |
| A_55_P2137314  | 0.584 | 0     | Kctd21        | potassium channel tetramerisation domain containing 21                          |
| A_55_P2161465  | 0.586 | 0.047 | Gm10516       | predicted gene 10516                                                            |
| A_51_P151126   | 0.586 | 0     | Cd52          | CD52 antigen                                                                    |
| A_55_P2099560  | 0.587 | 0.05  | Apobec1       | apolipoprotein B mRNA editing enzyme, catalytic polypeptide 1                   |
| A_30_P01026160 | 0.588 | 0.037 |               |                                                                                 |
| A_52_P325116   | 0.589 | 0.056 | Gramd1b       | GRAM domain containing 1B                                                       |
| A_52_P40954    | 0.59  | 0.02  | 5330426P16Rik | RIKEN cDNA 5330426P16 gene                                                      |
| A_55_P2207342  | 0.59  | 0.02  | 1810059H22Rik | RIKEN cDNA 1810059H22 gene                                                      |

|                |       |       |               |                                                                                                   |
|----------------|-------|-------|---------------|---------------------------------------------------------------------------------------------------|
| A_66_P126313   | 0.59  | 0.074 | Rhof          | ras homolog gene family, member f                                                                 |
| A_51_P388325   | 0.591 | 0.077 | Clgn          | calmegin                                                                                          |
| A_55_P2277715  | 0.591 | 0.017 | Nudt5         | nudix (nucleoside diphosphate linked moiety X)-type motif 5                                       |
| A_55_P2073557  | 0.591 | 0.028 | Slc27a5       | solute carrier family 27 (fatty acid transporter), member 5                                       |
| A_55_P2139538  | 0.591 | 0.01  | Gm7444        | ring finger protein 19A pseudogene                                                                |
| A_55_P2017845  | 0.591 | 0.017 | Ehbp1         | EH domain binding protein 1                                                                       |
| A_55_P2122789  | 0.591 | 0.056 | Homer1        | homer homolog 1 (Drosophila)                                                                      |
| A_51_P297925   | 0.592 | 0.082 | Zc3h12a       | zinc finger CCCH type containing 12A                                                              |
| A_30_P01029338 | 0.593 | 0.032 |               |                                                                                                   |
| A_55_P2160198  | 0.593 | 0.014 | Nipa2         | non imprinted in Prader-Willi/Angelman syndrome 2 homolog (human)                                 |
| A_55_P2121992  | 0.593 | 0.023 |               |                                                                                                   |
| A_55_P2266285  | 0.593 | 0.067 | 6330522J23Rik | RIKEN cDNA 6330522J23 gene                                                                        |
| A_55_P2108165  | 0.593 | 0.078 | Gm6907        | predicted gene 6907                                                                               |
| A_55_P2124976  | 0.594 | 0.011 | Grhl1         | grainyhead-like 1 (Drosophila)                                                                    |
| A_55_P2042590  | 0.594 | 0.052 | Polm          | polymerase (DNA directed), mu                                                                     |
| A_55_P2062793  | 0.594 | 0.071 | Mfap2         | microfibrillar-associated protein 2                                                               |
| A_51_P327121   | 0.595 | 0.038 | Was           | Wiskott-Aldrich syndrome homolog (human)                                                          |
| A_55_P1960261  | 0.595 | 0.004 | Gm608         | predicted gene 608                                                                                |
| A_30_P01026590 | 0.595 | 0.076 |               |                                                                                                   |
| A_30_P01024457 | 0.595 | 0.01  |               |                                                                                                   |
| A_55_P2030638  | 0.596 | 0.03  | Dusp23        | dual specificity phosphatase 23                                                                   |
| A_55_P2125376  | 0.596 | 0.097 | Cacna1d       | calcium channel, voltage-dependent, L type, alpha 1D subunit                                      |
| A_51_P337195   | 0.598 | 0.025 | Pipox         | pipecolic acid oxidase                                                                            |
| A_55_P2063755  | 0.599 | 0.069 | Naip6         | NLR family, apoptosis inhibitory protein 6                                                        |
| A_55_P2153461  | 0.599 | 0.007 | Cecr2         | cat eye syndrome chromosome region, candidate 2 homolog (human)                                   |
| A_55_P2010567  | 0.6   | 0.065 |               |                                                                                                   |
| A_55_P2075170  | 0.6   | 0.068 | Uhmk1         | U2AF homology motif (UHM) kinase 1                                                                |
| A_51_P476261   | 0.6   | 0.017 | Zfp120        | zinc finger protein 120                                                                           |
| A_55_P2167347  | 0.601 | 0.052 |               |                                                                                                   |
| A_51_P221677   | 0.601 | 0.012 | Trim62        | tripartite motif-containing 62                                                                    |
| A_52_P68223    | 0.601 | 0.058 | 4933421O10Rik | RIKEN cDNA 4933421O10 gene                                                                        |
| A_55_P2064659  | 0.603 | 0.057 | Trim12a       | tripartite motif-containing 12A                                                                   |
| A_55_P2005470  | 0.605 | 0.038 | Mfap4         | microfibrillar-associated protein 4                                                               |
| A_55_P1959017  | 0.605 | 0.017 |               |                                                                                                   |
| A_55_P2183518  | 0.606 | 0.006 |               |                                                                                                   |
| A_30_P01030888 | 0.606 | 0.025 |               |                                                                                                   |
| A_55_P2007802  | 0.606 | 0.094 | Smarca2       | SWI/SNF related, matrix associated, actin dependent regulator of chromatin, subfamily a, member 2 |
| A_30_P01018884 | 0.606 | 0.079 |               |                                                                                                   |
| A_55_P2068882  | 0.607 | 0.031 | Ccng2         | cyclin G2                                                                                         |
| A_52_P332487   | 0.607 | 0.015 | Ptpn7         | protein tyrosine phosphatase, non-receptor type 7                                                 |
| A_55_P1960693  | 0.608 | 0.053 | Gm11710       | predicted gene 11710                                                                              |
| A_51_P377452   | 0.608 | 0.058 | Ncf4          | neutrophil cytosolic factor 4                                                                     |
| A_55_P2025612  | 0.609 | 0.08  | Psme2         | proteasome (prosome, macropain) 28 subunit, beta                                                  |



|                |       |       |               |                                                                                               |
|----------------|-------|-------|---------------|-----------------------------------------------------------------------------------------------|
| A_55_P2401971  | 0.609 | 0.09  | AU015680      | expressed sequence AU015680                                                                   |
| A_52_P586141   | 0.61  | 0.055 | Adcy7         | adenylate cyclase 7                                                                           |
| A_52_P616544   | 0.61  | 0.032 | Ptprv         | protein tyrosine phosphatase, receptor type, V                                                |
| A_55_P2027087  | 0.61  | 0.098 | Plcl1         | phospholipase C-like 1                                                                        |
| A_55_P1977289  | 0.61  | 0.033 | Zbtb9         | zinc finger and BTB domain containing 9                                                       |
| A_55_P2061779  | 0.61  | 0.003 | Zfp456        | zinc finger protein 456                                                                       |
| A_51_P348749   | 0.61  | 0.059 | Lgl2          | lethal giant larvae homolog 2 (Drosophila)                                                    |
| A_51_P194377   | 0.61  | 0.076 | Pcbp4         | poly(rC) binding protein 4                                                                    |
| A_55_P2013863  | 0.61  | 0.029 | 1700028J19Rik | RIKEN cDNA 1700028J19 gene                                                                    |
| A_55_P2179974  | 0.611 | 0.002 | Spsb1         | splA/ryanodine receptor domain and SOCS box containing 1                                      |
| A_55_P2070992  | 0.611 | 0.076 | Aldoc         | aldolase C, fructose-bisphosphate                                                             |
| A_52_P84353    | 0.611 | 0.004 | Homez         | homeodomain leucine zipper-encoding gene                                                      |
| A_30_P01019428 | 0.612 | 0.023 |               |                                                                                               |
| A_55_P2319020  | 0.612 | 0.051 | BB557941      | expressed sequence BB557941                                                                   |
| A_55_P2000515  | 0.612 | 0.068 | Peli1         | pellino 1                                                                                     |
| A_55_P2133632  | 0.612 | 0.003 | Sipa1l2       | signal-induced proliferation-associated 1 like 2                                              |
| A_55_P2013665  | 0.613 | 0.021 | Mybpc2        | myosin binding protein C, fast-type                                                           |
| A_55_P2028259  | 0.614 | 0.041 | Rhbdf2        | rhomboid 5 homolog 2 (Drosophila)                                                             |
| A_51_P150653   | 0.614 | 0.016 | Ptprv         | protein tyrosine phosphatase, receptor type, V                                                |
| A_55_P2091736  | 0.615 | 0.008 | Rassf2        | Ras association (RalGDS/AF-6) domain family member 2                                          |
| A_55_P2002968  | 0.615 | 0     | Coro2a        | coronin, actin binding protein 2A                                                             |
| A_52_P655136   | 0.615 | 0.048 | Nlrc4         | NLR family, CARD domain containing 4                                                          |
| A_55_P2111530  | 0.615 | 0.07  |               |                                                                                               |
| A_51_P103222   | 0.615 | 0.044 | Slc39a4       | solute carrier family 39 (zinc transporter), member 4                                         |
| A_30_P01019364 | 0.616 | 0.06  |               |                                                                                               |
| A_52_P130639   | 0.617 | 0.082 | Aipl1         | aryl hydrocarbon receptor-interacting protein-like 1                                          |
| A_55_P1991585  | 0.617 | 0.018 | Blvrb         | biliverdin reductase B (flavin reductase (NADPH))                                             |
| A_51_P172231   | 0.617 | 0.02  | Gsdmd         | gasdermin D                                                                                   |
| A_51_P277295   | 0.617 | 0.091 | 2310001A20Rik | RIKEN cDNA 2310001A20 gene                                                                    |
| A_55_P1961451  | 0.618 | 0.001 | Adamts7       | a disintegrin-like and metallopeptidase (reprolysin type) with thrombospondin type 1 motif, 7 |
| A_55_P1972710  | 0.618 | 0.003 | Spinkl        | serine protease inhibitor, Kazal type-like                                                    |
| A_55_P2062598  | 0.618 | 0.056 | E2f7          | E2F transcription factor 7                                                                    |
| A_52_P139413   | 0.618 | 0.076 | Tmem221       | transmembrane protein 221                                                                     |
| A_66_P135176   | 0.619 | 0     | Trak2         | trafficking protein, kinesin binding 2                                                        |
| A_66_P103418   | 0.619 | 0.073 | Tmc8          | transmembrane channel-like gene family 8                                                      |
| A_51_P486239   | 0.619 | 0.01  | Clec3b        | C-type lectin domain family 3, member b                                                       |
| A_55_P2146374  | 0.619 | 0.054 | Nmnat1        | nicotinamide nucleotide adenyltransferase 1                                                   |
| A_55_P2080870  | 0.619 | 0.072 | Cmtm7         | CKLF-like MARVEL transmembrane domain containing 7                                            |
| A_51_P352264   | 0.619 | 0.03  | Sirt7         | sirtuin 7 (silent mating type information regulation 2, homolog) 7 (S. cerevisiae)            |
| A_30_P01020323 | 0.619 | 0.006 |               |                                                                                               |
| A_55_P2180086  | 0.62  | 0.071 | Lrrc28        | leucine rich repeat containing 28                                                             |
| A_55_P2093794  | 0.62  | 0.007 | Usp3          | ubiquitin specific peptidase 3                                                                |
| A_51_P394921   | 0.62  | 0.065 | 1700020L24Rik | RIKEN cDNA 1700020L24 gene                                                                    |

|                |       |       |               |                                                                                     |
|----------------|-------|-------|---------------|-------------------------------------------------------------------------------------|
| A_55_P2108221  | 0.62  | 0.041 |               |                                                                                     |
| A_55_P2041457  | 0.62  | 0.086 |               |                                                                                     |
| A_52_P71105    | 0.62  | 0.027 | Sertad3       | SERTA domain containing 3                                                           |
| A_55_P1960291  | 0.621 | 0.001 | Tjp3          | tight junction protein 3                                                            |
| A_55_P2302577  | 0.621 | 0.038 | AI426330      | expressed sequence AI426330                                                         |
| A_55_P2186572  | 0.621 | 0.027 | Lypla2        | lysophospholipase 2                                                                 |
| A_55_P2063661  | 0.622 | 0.01  | Tmem168       | transmembrane protein 168                                                           |
| A_55_P1979526  | 0.622 | 0.036 | Cdkn2b        | cyclin-dependent kinase inhibitor 2B (p15, inhibits CDK4)                           |
| A_52_P830312   | 0.623 | 0.019 | A230051G13Rik | RIKEN cDNA A230051G13 gene                                                          |
| A_52_P191567   | 0.623 | 0.043 | Plcl1         | phospholipase C-like 1                                                              |
| A_66_P131110   | 0.623 | 0.081 | Zfp473        | zinc finger protein 473                                                             |
| A_30_P01031367 | 0.623 | 0.092 |               |                                                                                     |
| A_55_P1973501  | 0.624 | 0.064 | Ceacam16      | carcinoembryonic antigen-related cell adhesion molecule 16                          |
| A_55_P2067131  | 0.624 | 0.081 | Dclre1c       | DNA cross-link repair 1C, PSO2 homolog (S. cerevisiae)                              |
| A_55_P2130535  | 0.624 | 0.093 | Dnmt3b        | DNA methyltransferase 3B                                                            |
| A_55_P2104071  | 0.625 | 0.076 | Defa23        | defensin, alpha, 23                                                                 |
| A_55_P2099520  | 0.625 | 0.065 | H2afv         | H2A histone family, member V                                                        |
| A_30_P01017477 | 0.625 | 0.003 |               |                                                                                     |
| A_55_P1956687  | 0.625 | 0.086 | Rab37         | RAB37, member of RAS oncogene family                                                |
| A_66_P110212   | 0.626 | 0.087 |               |                                                                                     |
| A_51_P278887   | 0.626 | 0.07  | Hint2         | histidine triad nucleotide binding protein 2                                        |
| A_51_P474701   | 0.626 | 0.056 | Fbp1          | fructose biphosphatase 1                                                            |
| A_30_P01030263 | 0.626 | 0.006 |               |                                                                                     |
| A_65_P05316    | 0.627 | 0.021 | Zfp182        | zinc finger protein 182                                                             |
| A_66_P120277   | 0.627 | 0.062 | 9330182L06Rik | RIKEN cDNA 9330182L06 gene                                                          |
| A_55_P2050268  | 0.627 | 0.008 | Nfkbid        | nuclear factor of kappa light polypeptide gene enhancer in B-cells inhibitor, delta |
| A_30_P01021974 | 0.627 | 0.05  |               |                                                                                     |
| A_30_P01019463 | 0.627 | 0.056 |               |                                                                                     |
| A_55_P1974347  | 0.627 | 0.022 | Fam126b       | family with sequence similarity 126, member B                                       |
| A_51_P512591   | 0.628 | 0     | Cdc42se1      | CDC42 small effector 1                                                              |
| A_52_P417825   | 0.628 | 0.029 | Osgin2        | oxidative stress induced growth inhibitor family member 2                           |
| A_55_P2009567  | 0.629 | 0.065 | Rod1          | ROD1 regulator of differentiation 1 (S. pombe)                                      |
| A_51_P418116   | 0.629 | 0.002 | Tmem119       | transmembrane protein 119                                                           |
| A_55_P2121446  | 0.629 | 0.078 | Gm10751       | predicted gene 10751                                                                |
| A_55_P1981830  | 0.629 | 0.077 |               |                                                                                     |
| A_55_P2037873  | 0.629 | 0.09  |               |                                                                                     |
| A_55_P2387121  | 0.629 | 0.008 | 4930426I24Rik | RIKEN cDNA 4930426I24 gene                                                          |
| A_52_P765764   | 0.63  | 0.03  |               |                                                                                     |
| A_55_P2155062  | 0.63  | 0.096 | Naa40         | N(alpha)-acetyltransferase 40, NatD catalytic subunit, homolog (S. cerevisiae)      |
| A_30_P01022407 | 0.63  | 0.09  |               |                                                                                     |
| A_55_P2047559  | 0.63  | 0.088 | 6330503K22Rik | RIKEN cDNA 6330503K22 gene                                                          |
| A_51_P520084   | 0.63  | 0.038 | Lypla2        | lysophospholipase 2                                                                 |
| A_55_P1976278  | 0.63  | 0.035 | Prkcb         | protein kinase C, beta                                                              |

|                |       |       |               |                                                                 |
|----------------|-------|-------|---------------|-----------------------------------------------------------------|
| A_55_P1987822  | 0.63  | 0.023 | Ufm1          | ubiquitin-fold modifier 1                                       |
| A_55_P1968433  | 0.631 | 0.006 | Agpat9        | 1-acylglycerol-3-phosphate O-acyltransferase 9                  |
| A_55_P2061278  | 0.631 | 0.071 | Sik1          | salt inducible kinase 1                                         |
| A_55_P2000062  | 0.631 | 0.025 | Irf1          | interferon regulatory factor 1                                  |
| A_51_P498442   | 0.631 | 0.022 | Slc34a1       | solute carrier family 34 (sodium phosphate), member 1           |
| A_51_P368009   | 0.632 | 0.012 | E2f2          | E2F transcription factor 2                                      |
| A_55_P2025273  | 0.632 | 0.058 | Trabd         | TraB domain containing                                          |
| A_55_P2065434  | 0.633 | 0.012 |               |                                                                 |
| A_55_P1967069  | 0.633 | 0.017 | Lpar6         | lysophosphatidic acid receptor 6                                |
| A_51_P372702   | 0.634 | 0.072 | Il16          | interleukin 16                                                  |
| A_51_P430900   | 0.634 | 0.02  | Dusp1         | dual specificity phosphatase 1                                  |
| A_55_P2068520  | 0.635 | 0.064 |               |                                                                 |
| A_55_P2020577  | 0.635 | 0.064 | Pcolce        | procollagen C-endopeptidase enhancer protein                    |
| A_55_P2172364  | 0.635 | 0.067 |               |                                                                 |
| A_30_P01032841 | 0.636 | 0.085 |               |                                                                 |
| A_55_P2067116  | 0.636 | 0.008 | Dclre1c       | DNA cross-link repair 1C, PSO2 homolog ( <i>S. cerevisiae</i> ) |
| A_55_P2121195  | 0.636 | 0.068 | Lcorl         | ligand dependent nuclear receptor corepressor-like              |
| A_51_P128336   | 0.636 | 0.095 | Serinc5       | serine incorporator 5                                           |
| A_55_P1994173  | 0.637 | 0.001 |               |                                                                 |
| A_52_P484838   | 0.637 | 0.02  | Rfxank        | regulatory factor X-associated ankyrin-containing protein       |
| A_55_P2036091  | 0.637 | 0.074 |               |                                                                 |
| A_55_P2170210  | 0.638 | 0.038 | Ap1s3         | adaptor-related protein complex AP-1, sigma 3                   |
| A_55_P2023235  | 0.639 | 0.034 | Fen1          | flap structure specific endonuclease 1                          |
| A_30_P01029886 | 0.639 | 0.084 |               |                                                                 |
| A_52_P400999   | 0.64  | 0.048 | Arhgap31      | Rho GTPase activating protein 31                                |
| A_30_P01027659 | 0.64  | 0.032 |               |                                                                 |
| A_55_P2158577  | 0.64  | 0.002 | Nphp4         | nephronophthisis 4 (juvenile) homolog (human)                   |
| A_30_P01029597 | 0.64  | 0.01  |               |                                                                 |
| A_51_P348397   | 0.64  | 0.048 | Hexim1        | hexamethylene bis-acetamide inducible 1                         |
| A_55_P2165120  | 0.641 | 0.097 | Cblb          | Casitas B-lineage lymphoma b                                    |
| A_55_P2190010  | 0.641 | 0.019 | 2010110K18Rik | RIKEN cDNA 2010110K18 gene                                      |
| A_51_P232207   | 0.641 | 0.041 | Hoxb6         | homeobox B6                                                     |
| A_55_P2030660  | 0.642 | 0.001 |               |                                                                 |
| A_55_P2161912  | 0.642 | 0.08  |               |                                                                 |
| A_51_P154997   | 0.642 | 0.027 | Brms1         | breast cancer metastasis-suppressor 1                           |
| A_55_P1984561  | 0.642 | 0.031 | Cpne2         | copine II                                                       |
| A_30_P01030293 | 0.642 | 0.046 |               |                                                                 |
| A_51_P352283   | 0.642 | 0.05  | Cyb561d1      | cytochrome b-561 domain containing 1                            |
| A_55_P2092296  | 0.643 | 0.018 | Fbxo2         | F-box protein 2                                                 |
| A_52_P533250   | 0.643 | 0.002 |               |                                                                 |
| A_55_P2056483  | 0.643 | 0.073 | Phkg1         | phosphorylase kinase gamma 1                                    |
| A_30_P01026346 | 0.644 | 0.092 |               |                                                                 |
| A_55_P2038452  | 0.645 | 0.056 |               |                                                                 |

|                |       |       |               |                                                                                   |
|----------------|-------|-------|---------------|-----------------------------------------------------------------------------------|
| A_51_P436878   | 0.645 | 0.073 | Sertad1       | SERTA domain containing 1                                                         |
| A_55_P2041753  | 0.645 | 0.005 | Sec22a        | SEC22 vesicle trafficking protein homologue A ( <i>S. cerevisiae</i> )            |
| A_30_P01025554 | 0.646 | 0.089 |               |                                                                                   |
| A_55_P2305525  | 0.647 | 0.067 | C81189        | expressed sequence C81189                                                         |
| A_51_P308597   | 0.647 | 0.009 | Gcm2          | glial cells missing homolog 2 ( <i>Drosophila</i> )                               |
| A_66_P128537   | 0.647 | 0.04  | Isg15         | ISG15 ubiquitin-like modifier                                                     |
| A_55_P2141544  | 0.648 | 0.004 |               |                                                                                   |
| A_52_P231232   | 0.648 | 0.036 | Nanos1        | nanos homolog 1 ( <i>Drosophila</i> )                                             |
| A_30_P01025495 | 0.648 | 0.046 |               |                                                                                   |
| A_55_P2052981  | 0.649 | 0.025 | Cdc23         | CDC23 (cell division cycle 23, yeast, homolog)                                    |
| A_55_P1958394  | 0.65  | 0.016 | Slit2         | slit homolog 2 ( <i>Drosophila</i> )                                              |
| A_55_P2061273  | 0.65  | 0.029 | Tbx6          | T-box 6                                                                           |
| A_51_P273508   | 0.65  | 0.018 | Ube2g1        | ubiquitin-conjugating enzyme E2G 1 (UBC7 homolog, <i>C. elegans</i> )             |
| A_51_P378009   | 0.65  | 0.042 | Blzf1         | basic leucine zipper nuclear factor 1                                             |
| A_51_P507778   | 0.65  | 0.049 | Sdr42e1       | short chain dehydrogenase/reductase family 42E, member 1                          |
| A_51_P238786   | 0.65  | 0.02  | Mcl1          | myeloid cell leukemia sequence 1                                                  |
| A_55_P2114569  | 0.65  | 0.012 | Zfp191        | zinc finger protein 191                                                           |
| A_51_P296100   | 0.651 | 0.021 | Rhot2         | ras homolog gene family, member T2                                                |
| A_55_P1989251  | 0.651 | 0.024 | Chfr          | checkpoint with forkhead and ring finger domains                                  |
| A_55_P2163018  | 0.652 | 0.082 |               |                                                                                   |
| A_55_P1964327  | 0.652 | 0.097 | Ppwd1         | peptidylprolyl isomerase domain and WD repeat containing 1                        |
| A_30_P01026426 | 0.652 | 0.051 |               |                                                                                   |
| A_55_P2139256  | 0.652 | 0.081 | Rps6ka1       | ribosomal protein S6 kinase polypeptide 1                                         |
| A_55_P2107577  | 0.653 | 0.033 | LOC100503257  | uncharacterized LOC100503257                                                      |
| A_55_P2052081  | 0.653 | 0.034 | Eif1ad        | eukaryotic translation initiation factor 1A domain containing                     |
| A_55_P2003129  | 0.653 | 0.038 | Tmem194       | transmembrane protein 194                                                         |
| A_55_P2070769  | 0.653 | 0.038 | Dus1l         | dihydrouridine synthase 1-like ( <i>S. cerevisiae</i> )                           |
| A_55_P2104572  | 0.654 | 0.015 | 6330416G13Rik | RIKEN cDNA 6330416G13 gene                                                        |
| A_30_P01020562 | 0.654 | 0.073 |               |                                                                                   |
| A_52_P425971   | 0.654 | 0.037 | 1700067K01Rik | RIKEN cDNA 1700067K01 gene                                                        |
| A_51_P222283   | 0.654 | 0.086 | Mlycd         | malonyl-CoA decarboxylase                                                         |
| A_55_P2163128  | 0.655 | 0.075 | 0610042G04Rik | RIKEN cDNA 0610042G04 gene                                                        |
| A_51_P250058   | 0.655 | 0.034 | Epas1         | endothelial PAS domain protein 1                                                  |
| A_55_P2013113  | 0.655 | 0.003 | Bak1          | BCL2-antagonist/killer 1                                                          |
| A_30_P01028900 | 0.655 | 0.085 |               |                                                                                   |
| A_65_P12104    | 0.656 | 0.005 | Tmtc1         | transmembrane and tetratricopeptide repeat containing 1                           |
| A_55_P2169839  | 0.656 | 0.072 | Rufy3         | RUN and FYVE domain containing 3                                                  |
| A_55_P1963915  | 0.657 | 0.031 | Gm7298        | murinoglobulin 1 pseudogene                                                       |
| A_30_P01020932 | 0.657 | 0.003 |               |                                                                                   |
| A_55_P1955691  | 0.657 | 0.012 | Alg6          | asparagine-linked glycosylation 6 homolog (yeast, alpha-1,3,-glucosyltransferase) |
| A_55_P1988065  | 0.657 | 0.019 | Gm17745       | predicted gene, 17745                                                             |
| A_52_P425860   | 0.658 | 0.08  | Iqsec1        | IQ motif and Sec7 domain 1                                                        |
| A_51_P103209   | 0.658 | 0.06  | Ttc7          | tetratricopeptide repeat domain 7                                                 |

|                |       |       |               |                                                                                    |
|----------------|-------|-------|---------------|------------------------------------------------------------------------------------|
| A_55_P2236153  | 0.658 | 0.022 | 1700006J14Rik | RIKEN cDNA 1700006J14 gene                                                         |
| A_30_P01019006 | 0.658 | 0.082 |               |                                                                                    |
| A_55_P2062568  | 0.658 | 0.053 | Caprin2       | caprin family member 2                                                             |
| A_55_P2045697  | 0.659 | 0.015 | Sirt7         | sirtuin 7 (silent mating type information regulation 2, homolog) 7 (S. cerevisiae) |
| A_51_P447866   | 0.659 | 0.082 | Sash3         | SAM and SH3 domain containing 3                                                    |
| A_30_P01030230 | 0.659 | 0.01  |               |                                                                                    |
| A_55_P2119011  | 0.659 | 0.063 | Osbp19        | oxysterol binding protein-like 9                                                   |
| A_30_P01020040 | 0.66  | 0.08  |               |                                                                                    |
| A_55_P2147250  | 0.66  | 0.031 | Caprin2       | caprin family member 2                                                             |
| A_30_P01030842 | 0.66  | 0.092 |               |                                                                                    |
| A_55_P2253746  | 0.66  | 0.052 | Nip7          | nuclear import 7 homolog (S. cerevisiae)                                           |
| A_55_P2070825  | 0.66  | 0.016 | Nudt5         | nudix (nucleoside diphosphate linked moiety X)-type motif 5                        |
| A_51_P163694   | 0.66  | 0.041 | Rufy1         | RUN and FYVE domain containing 1                                                   |
| A_30_P01019369 | 0.66  | 0.061 |               |                                                                                    |
| A_55_P2154557  | 0.661 | 0.003 |               |                                                                                    |
| A_55_P2089198  | 0.661 | 0.052 | Rgs7          | regulator of G protein signaling 7                                                 |
| A_55_P2031999  | 0.662 | 0.016 | 9030617O03Rik | RIKEN cDNA 9030617O03 gene                                                         |
| A_65_P14951    | 0.662 | 0.01  | Cblb          | Casitas B-lineage lymphoma b                                                       |
| A_30_P01031507 | 0.662 | 0.075 |               |                                                                                    |
| A_55_P2021099  | 0.662 | 0.032 | Tmem181a      | transmembrane protein 181A                                                         |
| A_52_P493091   | 0.662 | 0.017 | Fmr1          | fragile X mental retardation syndrome 1 homolog                                    |
| A_55_P1968085  | 0.662 | 0.063 |               |                                                                                    |
| A_55_P1979147  | 0.662 | 0.097 | Klrb1c        | killer cell lectin-like receptor subfamily B member 1C                             |
| A_55_P2038130  | 0.663 | 0.043 | Ptprj         | protein tyrosine phosphatase, receptor type, J                                     |
| A_51_P109369   | 0.663 | 0.068 | Fbxo32        | F-box protein 32                                                                   |
| A_55_P2186580  | 0.664 | 0.045 | 2810021J22Rik | RIKEN cDNA 2810021J22 gene                                                         |
| A_52_P647291   | 0.664 | 0.065 | Cecr2         | cat eye syndrome chromosome region, candidate 2 homolog (human)                    |
| A_55_P2051229  | 0.664 | 0.002 | Gpr132        | G protein-coupled receptor 132                                                     |
| A_55_P1955816  | 0.665 | 0.066 | 2810021J22Rik | RIKEN cDNA 2810021J22 gene                                                         |
| A_55_P2039324  | 0.666 | 0.08  | Ccnf          | cyclin F                                                                           |
| A_30_P01025376 | 0.666 | 0.06  |               |                                                                                    |
| A_51_P268843   | 0.666 | 0.041 | Rasip1        | Ras interacting protein 1                                                          |
| A_30_P01022721 | 0.666 | 0.003 |               |                                                                                    |
| A_66_P128909   | 0.666 | 0.089 | Numbl         | numb-like                                                                          |
| A_55_P2063256  | 0.666 | 0.097 | Lgals4        | lectin, galactose binding, soluble 4                                               |
| A_55_P2056241  | 0.666 | 0.033 | Pdlim5        | PDZ and LIM domain 5                                                               |
| A_55_P2129407  | 0.667 | 0.033 |               |                                                                                    |
| A_51_P196695   | 0.667 | 0.042 | Il7r          | interleukin 7 receptor                                                             |
