# Supplementary material
Source: PubMed Central journal article supplement (PMC4716303)
Supplement: cdd201587x6.pdf [file cdd201587x6.pdf]

**predicted targets downregulated > 1.5 fold with and without IL-7**

| Fold Change + IL-7 | Fold Change -IL-7 | GENE_SYMBOL | PicTar | miRanda | PITA |
|--------------------|-------------------|-------------|--------|---------|------|
| 0.336              | 0.307             | Trp53inp1   | X      | X       | X    |
| 0.389              | 0.368             | Arid3a      |        |         | X    |
| 0.419              | 0.429             | Ceacam2     |        | X       |      |
| 0.432              | 0.458             | Abtb1       | X      | X       | X    |
| 0.443              | 0.338             | Mreg        |        | X       |      |
| 0.461              | 0.387             | Cln6        |        | X       |      |
| 0.469              | 0.461             | Lactb       | X      | X       | X    |
| 0.480              | 0.396             | Ptpn18      | X      | X       | X    |
| 0.504              | 0.404             | Npl         |        | X       | X    |
| 0.507              | 0.450             | Atg4d       | X      |         | X    |
| 0.526              | 0.547             | Tube1       |        | X       |      |
| 0.531              | 0.412             | Cyb5r4      |        | X       |      |
| 0.546              | 0.453             | Tmem123     |        | X       | X    |
| 0.551              | 0.538             | Cecr2       |        | X       |      |
| 0.583              | 0.566             | Map3k11     |        | X       | X    |
| 0.583              | 0.571             | Fam116a     |        | X       |      |
| 0.584              | 0.564             | Mphosph6    |        | X       |      |
| 0.587              | 0.532             | Acp1        |        | X       |      |
| 0.601              | 0.521             | Galnt14     | X      | X       | X    |
| 0.601              | 0.444             | Scn2b       | X      | X       | X    |
| 0.612              | 0.553             | Mudeng      |        | X       |      |
| 0.614              | 0.581             | Lbh         | X      | X       | X    |
| 0.619              | 0.541             | Tor2a       |        | X       | X    |
| 0.622              | 0.549             | Usp12       | X      |         | X    |
| 0.629              | 0.541             | Traf6       |        | X       | X    |
| 0.632              | 0.632             | E2f2        |        |         | X    |
| 0.642              | 0.650             | Blzf1       | X      | X       | X    |
| 0.645              | 0.564             | Pctp        |        | X       | X    |
| 0.647              | 0.657             | Alg6        |        | X       |      |
| 0.651              | 0.596             | Dusp23      |        | X       |      |
| 0.654              | 0.482             | Myo1c       |        | X       |      |
| 0.654              | 0.656             | Rufy3       |        | X       |      |
| 0.656              | 0.634             | Il16        | X      | X       | X    |
| 0.656              | 0.636             | Lcorl       | X      |         | X    |
| 0.663              | 0.662             | Fmr1        |        | X       |      |
| 0.665              | 0.611             | Homez       |        | X       | X    |

**predicted targets downregulated > 1.5 fold with IL-7 only**

| Fold Change + IL-7 | Fold Change -IL-7 | GENE_SYMBOL   | PicTar | miRanda | PITA |
|--------------------|-------------------|---------------|--------|---------|------|
| 0.475              |                   | Sik2          |        | X       |      |
| 0.505              |                   | Bcar1         |        | X       |      |
| 0.506              |                   | Grk4          |        | X       |      |
| 0.582              |                   | Dnajb5        |        | X       | X    |
| 0.618              |                   | Zbtb7a        |        |         | X    |
| 0.648              |                   | 4632415K11Rik |        | X       |      |
| 0.652              |                   | Adam9         | X      |         |      |
| 0.658              |                   | Baz2a         |        | X       | X    |

**predicted targets downregulated > 1.5 fold without IL-7 only**

| Fold Change + IL-7 | Fold Change -IL-7 | GENE_SYMBOL   | PicTar | miRanda | PITA |
|--------------------|-------------------|---------------|--------|---------|------|
|                    | 0.259             | Maf           | X      |         | X    |
|                    | 0.295             | Cpne2         |        | X       |      |
|                    | 0.375             | Neu1          | X      | X       | X    |
|                    | 0.389             | Dynlt3        |        | X       |      |
|                    | 0.390             | Nrm           | X      | X       | X    |
|                    | 0.424             | Slc46a3       |        | X       |      |
|                    | 0.428             | Ece1          |        | X       |      |
|                    | 0.463             | Cntd1         |        | X       |      |
|                    | 0.465             | Tnfaip3       |        | X       |      |
|                    | 0.472             | Fam46c        |        | X       |      |
|                    | 0.481             | Il2ra         |        | X       |      |
|                    | 0.487             | Gpr77         |        | X       |      |
|                    | 0.517             | Ddx19b        |        | X       |      |
|                    | 0.537             | Enpep         | X      | X       | X    |
|                    | 0.538             | Pop5          |        | X       |      |
|                    | 0.542             | Spns3         |        | X       |      |
|                    | 0.543             | Btg2          |        |         |      |
|                    | 0.552             | Tnfrsf1b      |        | X       |      |
|                    | 0.557             | Shank2        |        | X       |      |
|                    | 0.564             | Whrn          |        | X       |      |
|                    | 0.568             | 4930572J05Rik |        | X       |      |
|                    | 0.584             | Kctd21        | X      | X       | X    |
|                    | 0.592             | Zc3h12a       |        | X       |      |
|                    | 0.595             | Was           |        | X       |      |
|                    | 0.598             | Pipox         |        | X       |      |
|                    | 0.607             | Ccng2         |        | X       |      |
|                    | 0.607             | Ptpn7         |        | X       |      |
|                    | 0.610             | Zbtb9         |        | X       |      |
|                    | 0.610             | 1700028J19Rik |        | X       |      |
|                    | 0.614             | Rhbdf2        |        | X       |      |
|                    | 0.615             | Coro2a        |        | X       |      |
|                    | 0.617             | 2310001A20Rik |        | X       |      |
|                    | 0.619             | Trak2         |        | X       |      |
|                    | 0.619             | Clec3b        |        | X       |      |
|                    | 0.619             | Nmnat1        |        | X       |      |
|                    | 0.619             | Sirt7         | X      | X       | X    |
|                    | 0.620             | Lrrc28        |        | X       |      |
|                    | 0.620             | Usp3          |        | X       |      |
|                    | 0.620             | Sertad3       | X      | X       | X    |
|                    | 0.621             | Lypla2        | X      |         | X    |
|                    | 0.622             | Tmem168       | X      | X       | X    |
|                    | 0.622             | Cdkn2b        |        | X       |      |
|                    | 0.623             | A230051G13Rik |        | X       |      |
|                    | 0.623             | Zfp473        |        | X       |      |
|                    | 0.627             | Fam126b       | X      |         | X    |
|                    | 0.628             | Cdc42se1      | X      | X       | X    |
|                    | 0.630             | Naa40         |        | X       |      |
|                    | 0.632             | Trabd         |        | X       |      |
|                    | 0.635             | Pcolce        |        | X       |      |
|                    | 0.637             | Rfxank        |        | X       |      |
|                    | 0.642             | Brms1         |        | X       |      |

|       |               |   |   |   |
|-------|---------------|---|---|---|
| 0.642 | Cyb561d1      |   | X |   |
| 0.650 | Ube2g1        |   | X |   |
| 0.650 | Mcl1          | X | X | X |
| 0.651 | Rhot2         |   | X |   |
| 0.651 | Chfr          |   | X |   |
| 0.652 | Ppwd1         |   | X |   |
| 0.652 | Rps6ka1       | X | X | X |
| 0.653 | Eif1ad        | X | X | X |
| 0.653 | Dus1l         | X | X | X |
| 0.654 | 6330416G13Rik |   | X |   |
| 0.654 | Mlycd         |   | X |   |
| 0.655 | Bak1          | X | X | X |
| 0.658 | Ttc7          |   | X |   |
| 0.659 | Osbpl9        | X | X | X |
| 0.662 | 9030617O03Rik |   | X |   |
| 0.663 | Fbxo32        |   | X |   |
| 0.666 | Numbl         | X |   | X |
| 0.667 | Il7r          |   | X |   |
