# Supplementary material
Source: PubMed Central journal article supplement (PMC4716303)
Supplement: cdd201587x7.pdf [file cdd201587x7.pdf]

|             | <b>+ IL-7</b>      |                | <b>- IL-7</b>      |                |               |                |             |
|-------------|--------------------|----------------|--------------------|----------------|---------------|----------------|-------------|
|             | <b>Fold Change</b> | <b>P-Value</b> | <b>Fold Change</b> | <b>P-Value</b> | <b>PicTar</b> | <b>miRanda</b> | <b>PITA</b> |
| Trp53inp1   | 0.336              | 0.063          | 0.308              | 0.007          | X             | X              | X           |
| Arid3a      | 0.389              | 0.032          | 0.368              | 0.04           |               |                | X           |
| Abtb1       | 0.432              | 0.042          | 0.458              | 0.044          | X             | X              | X           |
| Lactb       | 0.469              | 0.045          | 0.497              | 0.066          | X             | X              | X           |
| Ptpn18      | 0.48               | 0.052          | 0.396              | 0.04           | X             | X              |             |
| Atg4d       | 0.507              | 0.067          | 0.45               | 0.038          | X             |                | X           |
| Btg2        | 0.523              | 0.123          | 0.543              | 0.027          |               |                | X           |
| Tmem123     | 0.546              | 0.081          | 0.453              | 0.022          |               | X              | X           |
| MAP3K11     | 0.583              | 0.056          | 0.566              | 0.008          |               | X              | X           |
| LBH         | 0.614              | 0.002          | 0.697              | 0.171          | X             | X              | X           |
| Enpep       | 0.616              | 0.13           | 0.537              | 0.026          | X             | X              | X           |
| Usp12       | 0.622              | 0.084          | 0.549              | 0.01           | X             |                | X           |
| E2F2        | 0.632              | 0.094          | 0.632              | 0.012          |               |                | X           |
| Blzf1       | 0.642              | 0.076          | 0.65               | 0.042          | X             | X              | X           |
| Baz2a       | 0.658              | 0.062          | 0.669              | 0.036          |               | X              | X           |
| Homez       | 0.665              | 0.072          | 0.611              | 0.004          |               | X              | X           |
| Sirt7       | 0.682              | 0.199          | 0.619              | 0.031          | X             | X              | X           |
| Rhot2       | 0.7                | 0.064          | 0.651              | 0.021          |               | X              |             |
| Sertad3     | 0.701              | 0.192          | 0.62               | 0.027          | X             | X              | X           |
| Tnfaip3/A20 | 0.766              | 0.437          | 0.465              | 0.022          |               | X              | X           |
| Bak1        | 0.803              | 0.161          | 0.655              | 0.003          | X             | X              | X           |
| Rps6ka1     | 0.842              | 0.161          | 0.652              | 0.081          | X             | X              | X           |
| eIF1ad      | 0.846              | 0.357          | 0.653              | 0.034          | X             | X              | X           |

"X" indicates that the gene is predicted by the respective algorithm
