# Supplementary material
Source: PubMed Central journal article supplement (PMC4716303)

Figure S1

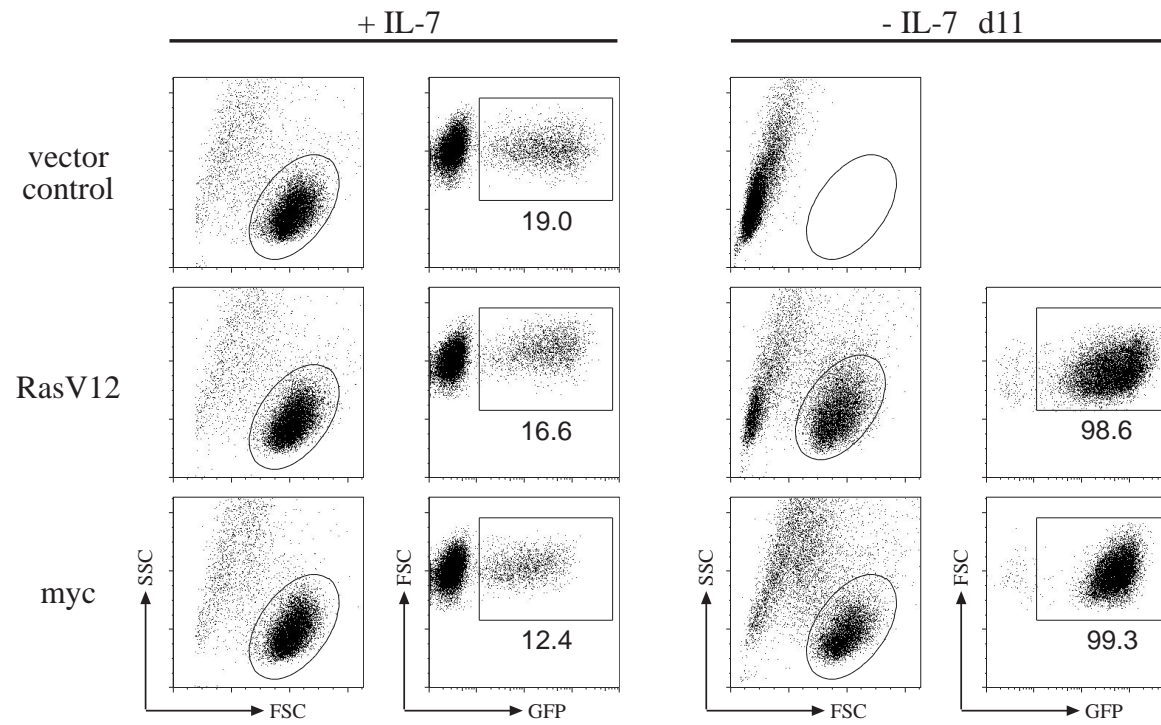

Figure S2

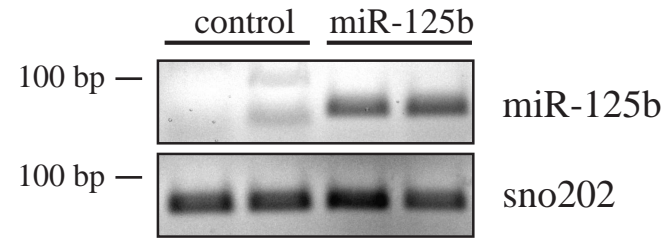

Figure S3

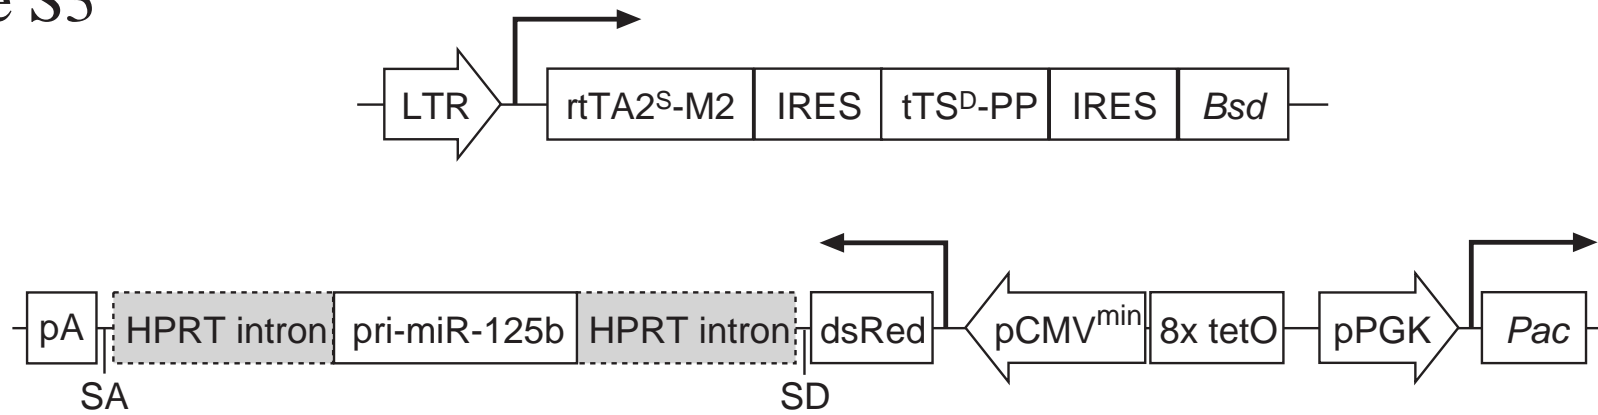

Figure S4

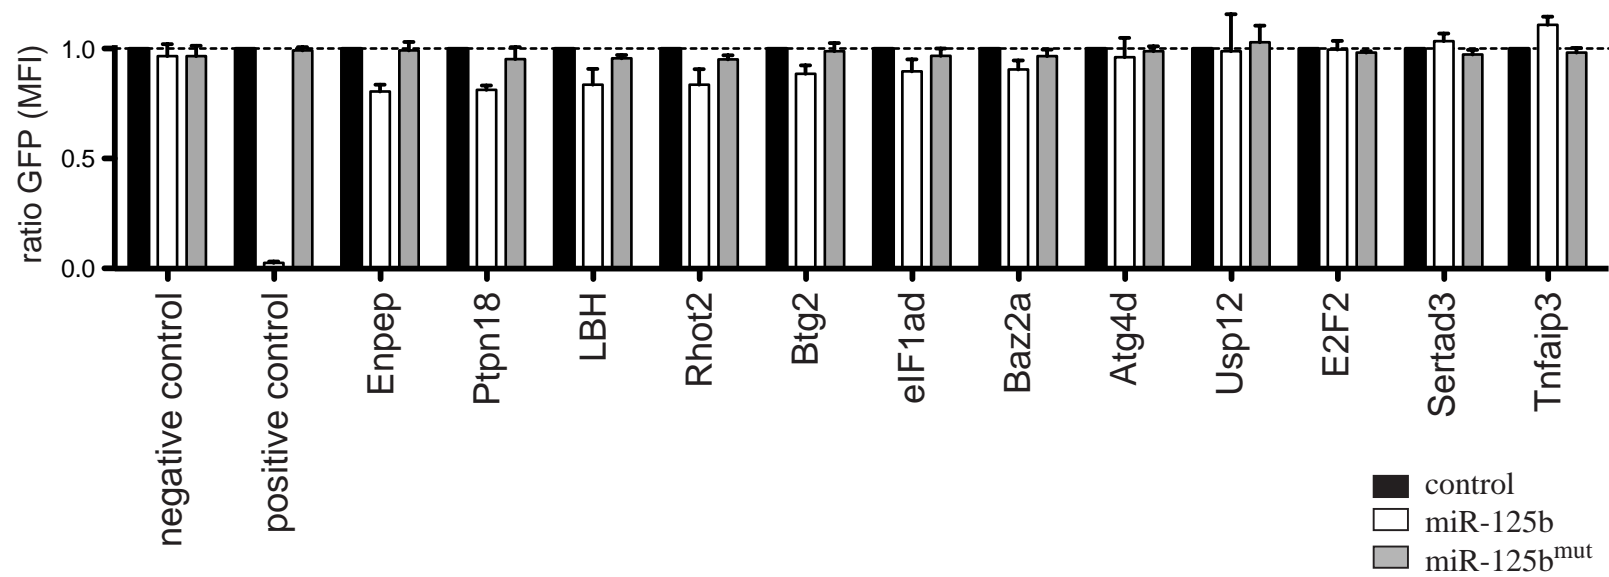

Figure S5

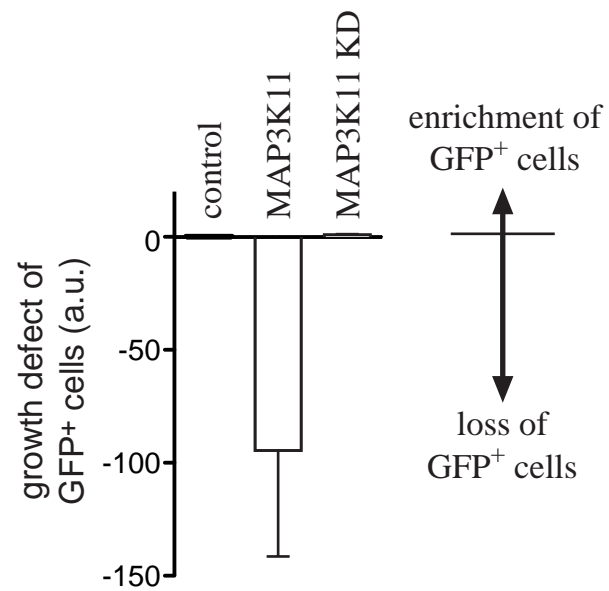

Figure S6

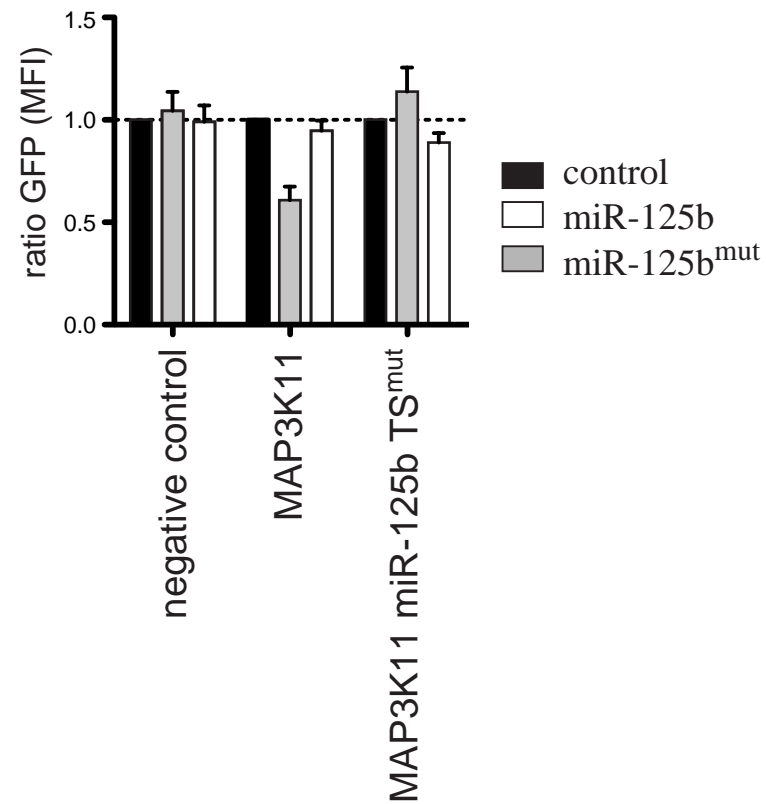

Figure S7

A

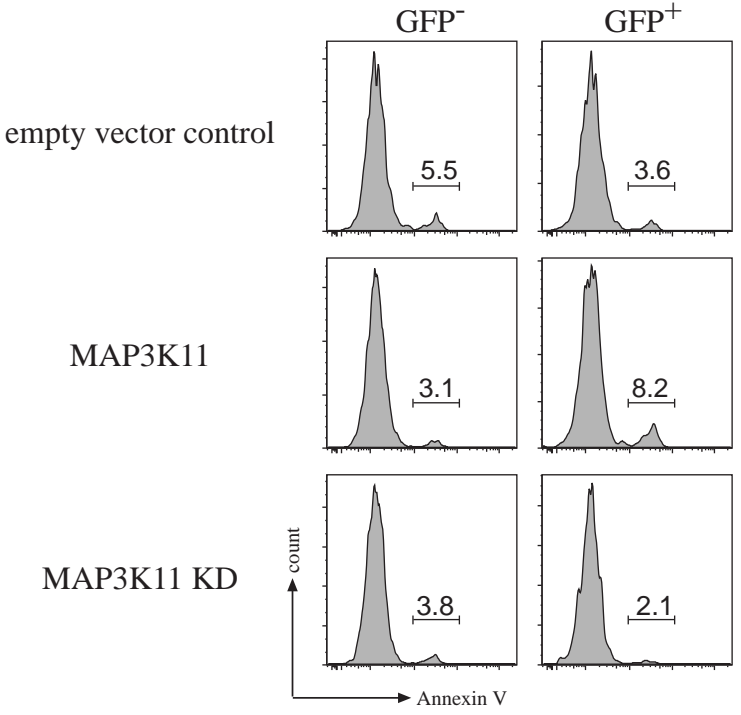

B

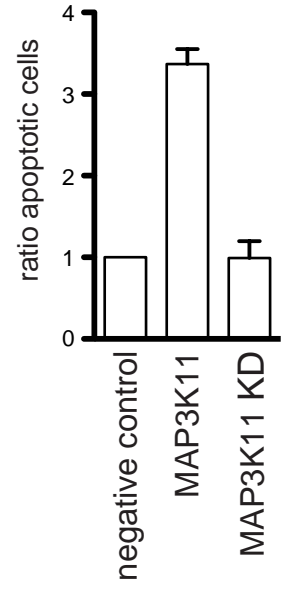

Figure S8

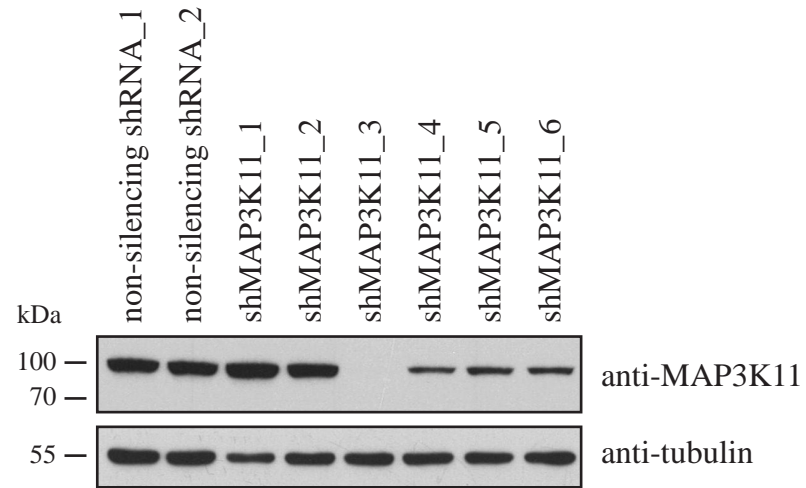

Figure S9

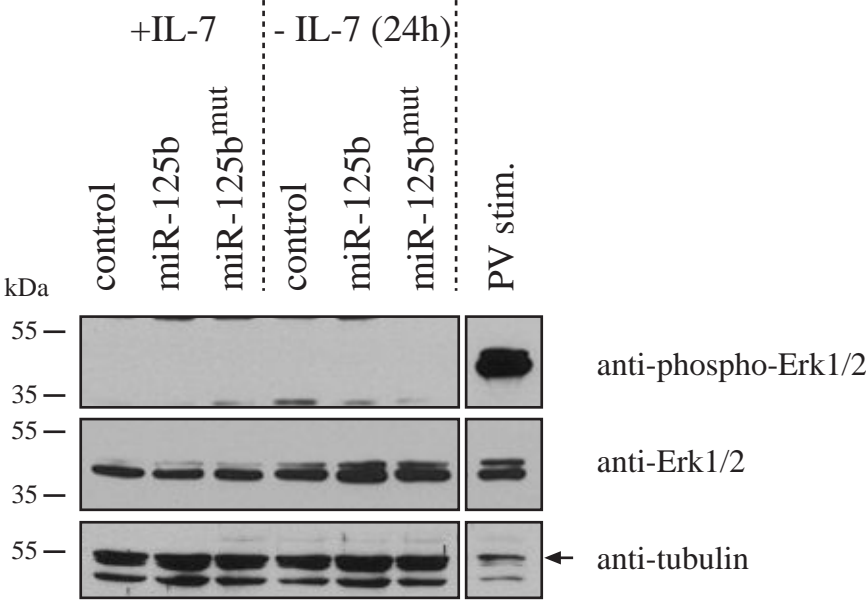

Figure S10

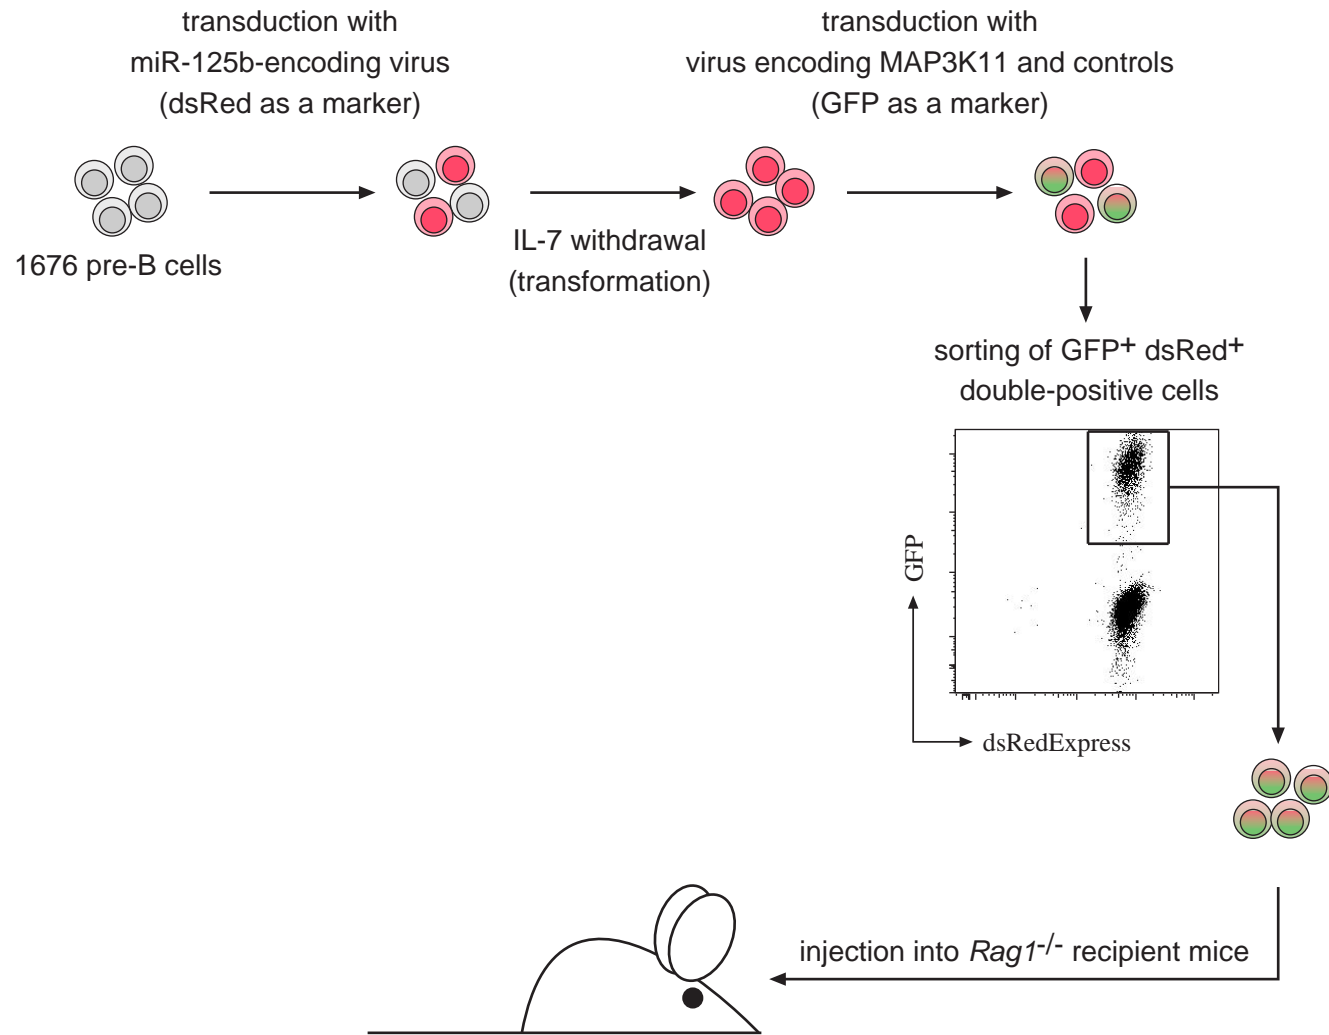



Figure S11

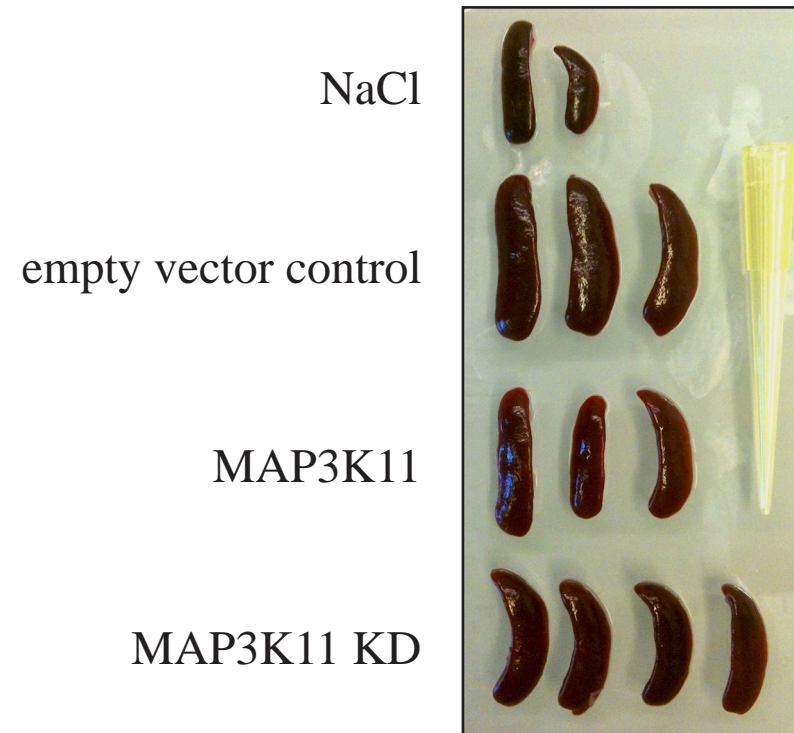

Supplement: cdd201587x1.pdf [file cdd201587x1.pdf]
